# Supplementary material
Source: Research Square preprint supplement (doi:10.21203/rs.3.rs-9014119/v1)
Supplement: Supplementary file 1 [file 86286082f695cd578240eab9.docx]

**Table 4: Clinical Predictors of SpN.N=280**

| **Variables** | **Β** | **p-value** | **Odd Ratio** | **95 % C I** |
| --- | --- | --- | --- | --- |

| **Depression** |  |  |  |  |
| --- | --- | --- | --- | --- |
| Normal | -0.461 | 0.693 | 0.631 | 0.064 – 6.211 |
| Borderline | -0.326 | 0.778 | 0.722 | 0.075 – 6.942 |
| Abnormal | RC |  |  |  |
| **Anxiety** |  |  |  |  |
| Normal | -2.608 | 0.061 | 0.074 | 0.005 – 1.128 |
| Borderline | -2.267 | 0.104 | 0.104 | 0.007 – 1.589 |
| Abnormal | RC |  |  |  |
| **Satisfaction With Usual Car**e | -1.323 | **0.042** | 0.266 | 0.074 – 0.952 |
| **Rating of QoL** |  |  |  |  |
| Poor | RC |  |  |  |
| Neither poor nor good | 1.527 | 0.186 | 4.605 | 0.478 – 14.334 |
| Good | 0.926 | 0.367 | 2.525 | 0.338 – 18.871 |
| Very good | 1.379 | 0.255 | 3.972 | 0.369 – 14.279 |
| **Health satisfaction** |  |  |  |  |
| Very dissatisfied | RC |  |  |  |
| Dissatisfied | -1.456 | 0.593 | 0.233 | 0.001 – 4.877 |
| Neither satisfied nor dissatisfied | 0.505 | 0.853 | 1.657 | 0.008 – 3.442 |
| Satisfied | 0.461 | 0.863 | 1.586 | 0.008 – 2.969 |
| Very satisfied | -0.438 | 0.876 | 0.645 | 0.003 – 15.695 |
| **Overall QoL score** |  |  |  |  |
| Low | RC |  |  |  |
| High | 0.607 | **0.033** | 1.835 | 1.049 – 3208 |
| **Chronic conditions** |  |  |  |  |
| Yes | 0.074 | 0.891 | 1.077 | 0.373 – 3.105 |
| No | RC |  |  |  |
| **Presence of geriatric syndromes** |  |  |  |  |
| Yes | 0.619 | **0.032** | 1.858 | 1.053 – 3.277 |
| No | RC |  |  |  |
| **Presence of chronic and geriatric conditions** |  |  |  |  |
| Yes | 0.431 | 0.447 | 1.538 | 0.507 – 4.665 |
| No | RC |  |  |  |
